# Supplementary material for: Non-adiabatic photodissociation dynamics of vinyl iodide from nσ* and nπ* transitions
Source: Royal Society of Chemistry journal article supplement (doi:10.1039/d5cp00236b), 2025-01-01
Supplement: d5cp00236b1.pdf [file d5cp00236b1.pdf]

## Electronic Supplementary Information

### Non-adiabatic photodissociation dynamics of vinyl iodide from *nσ\** and *nπ\** transitions

Marta L. Murillo-Sánchez,<sup>a,†</sup> Sonia Marggi Poullain,<sup>a</sup> Paulo Limão-Vieira,<sup>b</sup>  
Alexandre Zanchet,<sup>c</sup> Nelson de Oliveira,<sup>d</sup> Jesús González-Vázquez,<sup>e,f</sup> and  
Luis Bañares.<sup>a,g</sup>

## VUV spectroscopy analysis of C<sub>2</sub>H<sub>3</sub>I

Vinyl iodide is a  $C_s$  symmetry molecule in the electronic ground state with its 8 outermost electrons yielding an electronic configuration according to Sze et al.<sup>1</sup> of  $(1a'')^2 (6a')^2 (7a')^2 (2a'')^2: \tilde{X}^1A'$ . The high-resolution vacuum ultraviolet (VUV) photoabsorption spectrum of vinyl iodide, C<sub>2</sub>H<sub>3</sub>I, measured at room temperature in the photon energy range 5.0–10.7 eV, is shown in Figure S1 (and expanded views in Figures S2-S7) and the fine structure much better resolved than in the previous collected by Boschi and Salahub [1] and the pseudo-optical conditions of Sze et al. [2]. The main absorption bands relevant to the present data can be classified as valence, ( $\pi^* \leftarrow n$ ), and members of Rydberg series of the type ( $ns \leftarrow n_I$ ) and ( $nd \leftarrow n_I$ ) (Table I) [1]. The absorption features are rich in vibrational progressions. The normal mode description has been assigned according to the information in the vibrational spectrum of Torkington and Thompson [3] and involves mainly C=C stretching,  $\nu_4$ , C–I stretching,  $\nu_5$ , C–I deformation,  $\nu_6$ , CH<sub>2</sub> deformation,  $\nu_7$ , and deformation,  $\nu_8$  modes, with energies in the ground state 0.198 eV (1593 cm<sup>-1</sup>), 0.066 eV (535 cm<sup>-1</sup>), 0.038 eV (309 cm<sup>-1</sup>), 0.171 eV (1376 cm<sup>-1</sup>) and 0.123 eV (990 cm<sup>-1</sup>), respectively [3]. Relevant to note that Sze et al. [2] have reported for the lowest-lying ionic state vibrational energy values of 0.156 eV ( $\nu_4$ ), 0.037 eV ( $\nu_5$ ), 0.144 eV ( $\nu_7$ ), which are relevant for identifying vibrational series present in the different Rydberg series assigned below.

The photoabsorption structure observed in the 5.4–6.2 eV band is shown in detail in Figure S2 with its origin  $0_0^0$  at 5.58(5) eV followed by a weak progression of broad features assigned to the C=C stretching mode,  $\nu_4$ ; also visible in this energy region, a second absorption feature at 6.03(8) eV accommodating  $\nu_4$  and also the C–I stretching mode,  $\nu_5$  (see Table II). Boschi and Salahub [1] have speculated about the assignment of the later as either being part of the former band separated by 3600 cm<sup>-1</sup> (0.446 eV) from its origin and assigned to a C–H stretching quantum or just simply due to another electronic transition. Yet, a close inspection of this photoabsorption feature at 6.03(8) eV, shows a different slope from the feature at 5.58(5) eV and so we believe that the former may belong to a different electronic transition. Nonetheless, the theoretical calculations should provide an answer for this ansatz.

The 6.0–6.8 eV energy range with its vibrational assignments is depicted in Figure S3 and Tables IIIa and IIIb. Electronic excitations discussed in this region are solely due to

promotion from the highest occupied molecular orbitals (HOMO) and (HOMO-1), iodine lone pairs  $n_I(5p_\perp)$  and  $n_I(5p_\parallel)$ , to valence ( $\sigma_{CI}^*$ ,  $\pi_{CC}^*$ ) (see Table I). The  $0_0^0$  photoabsorption feature at 6.03(8) eV is assigned to the ( $\sigma_{CI}^* \leftarrow n_{I(\parallel)}$ ) transition, and in good agreement with the experimental data reported by Boschi and Salahub, [1] and Sze et al. [2] at 6.050 and 6.060 eV, respectively (Table I). The potential energy curves for the low-lying excited singlet states of vinyl iodide plotted as a function of the C–I coordinate depicted in the manuscript are consistent with the relevant  $\sigma_{CI}^*$  antibonding character resulting from the adiabatic description of the transition at  $\sim 6$  eV. This electronic transition is accompanied by a weak feature at 6.106 eV and is here tentatively assigned for the first time to excitation of one quantum C–I stretching mode,  $\nu_5$ , with an energy of 0.068 eV (see Table IIa). Such feature can be related to the predissociative character of the accessed electronic state in the diabatic description at  $\sim 2.5$  Å, 30 fs after the C–I bond is stretched. This can only be possible if in the electronic transition, as the reaction coordinate evolves, the nuclear wavepacket survives long enough for the system to change its  $\pi^*$  to  $\sigma^*$  character.

The next  $0_0^0$  band is tentatively assigned at 6.166 eV with a maximum at 6.291 eV and a local cross-section value of 50.7 Mb (Table I). Although this could be due to a ( $6s \leftarrow n_I$ ) Rydberg transition, the present results, experiments and calculations, predict a ( $\pi_{CC}^* \leftarrow n$ ) character. Within this absorption band vibrational assignments (Tables IIa) together with progressions involving the C=C stretching mode,  $\nu_4$ , ( $4^n$ ) coupled with the C–I stretching mode,  $\nu_5$  (Table IIb) are reported. A careful inspection of the absorption band reveals that the feature at 6.452 eV, assigned to the excitation of C–I stretching mode,  $\nu_5$  coupled with a progression of the C=C stretching mode,  $\nu_4$  (see Table IIb), has been assigned in the pseudo-optical experiment of Sze et al. [2] to a ( $\pi_{CC}^* \leftarrow n_{I(\parallel)}$ ) transition at 6.467 eV. The  $\pi_{CC}^*$  character is consistent with the electron spin densities calculated here and assigned to state 13.

The next absorption band in the 6.8–7.5 eV energy region may accommodate three electronic transitions as per in Boschi and Salahub’s data analyses [1] and our assignments are presented in Table IV. The first transition is tentatively assigned at 6.849 eV and accommodates fine structure due to C–I deformation,  $\nu_6$ , and deformation,  $\nu_8$ , modes [3]. Two weak features to the left of the transition are proposed to be hot-bands involving  $\nu_6$  and  $\nu_8$ , modes. The other two transitions have been assigned at 6.99(1) and 7.228 eV, the former more difficult to determine due to the considerable contribution of several modes being active in this region, the later mainly involving a Rydberg excitation coupled with C–I deformation mode,  $\nu_6$ .

The next absorption region 7.4–8.2 eV is assigned in detail in Table V where a rich vibrational pattern involves mainly C=C stretching,  $\nu_4$ , C–I stretching,  $\nu_5$ , C–I deformation,  $\nu_6$ , and CH<sub>2</sub> deformation,  $\nu_7$ , modes. Also present in this energy region progression bands involving mainly CH<sub>2</sub> deformation,  $\nu_7$ , mode.

The next set of Tables VI–VII reports the vibrational assignments and progressions in the 8.1–10.3 eV photon energy region mainly coupled with Rydberg series converging to the three lowest ionisation energies ( $2a''^{-1}$ ), ( $7a'^{-1}$ ) and ( $1a''^{-1}$ ).

### Rydberg transitions

Vinyl iodide electronic excitation in the photon energy range studied in this work displays Rydberg character where a summary of the experimental energies, assignments and quantum defects can be found in Tables VIIIa-c. The peak positions have been tested using the Rydberg formula:  $E_n = E_1 - R/(n-\delta)^2$ , where  $E_1$  is the ionisation energy,  $n$  is the principal quantum number of the Rydberg orbital of energy  $E_n$ ,  $R$  is the Rydberg constant (13.61 eV), and  $\delta$  is the quantum defect resulting from the penetration of the Rydberg orbital into the core. Yet, with quantum defect calculations as our only guide, we cannot propose assignments for these bands with confidence, so values for higher  $n$  Rydberg states in Table VIIIa-c are tentative assignments. The lowest-lying ionisation energies relevant to this work 9.26, 10.01 and 11.50 eV were taken from the He(I) photoelectron spectroscopy data of Sze et al. [2] and assigned to the removal of an electron from ( $n_{I(L)})(2a''^{-1})$ , ( $n_{I(I)})(7a'^{-1})$  and ( $\pi_{CC})(1a''^{-1})$ , respectively.

Figure S1. High-resolution VUV photoabsorption spectrum of vinyl iodide,  $C_2H_3I$  in the 5.9–10.7 eV photon energy range.

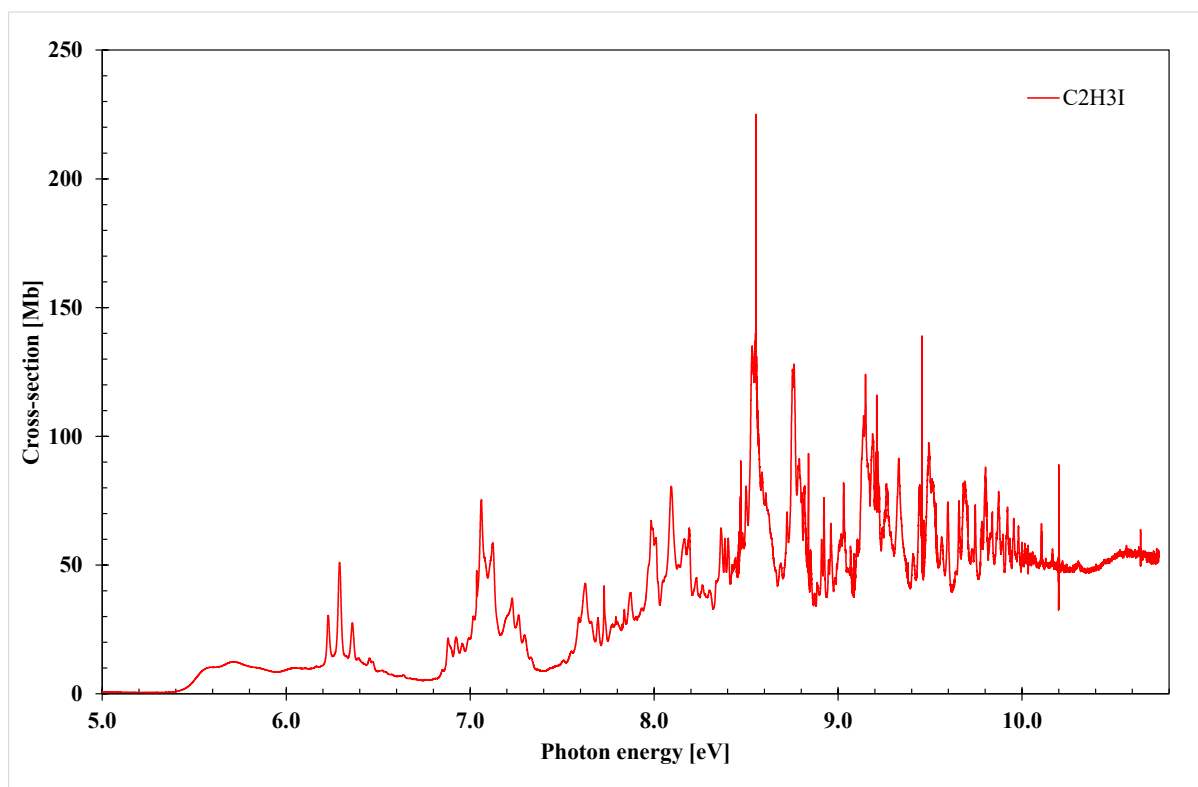

Figure S2. VUV photoabsorption spectrum of vinyl iodide,  $C_2H_3I$  in the 5.4–6.2 eV photon energy range together with assignments of the main absorption features.

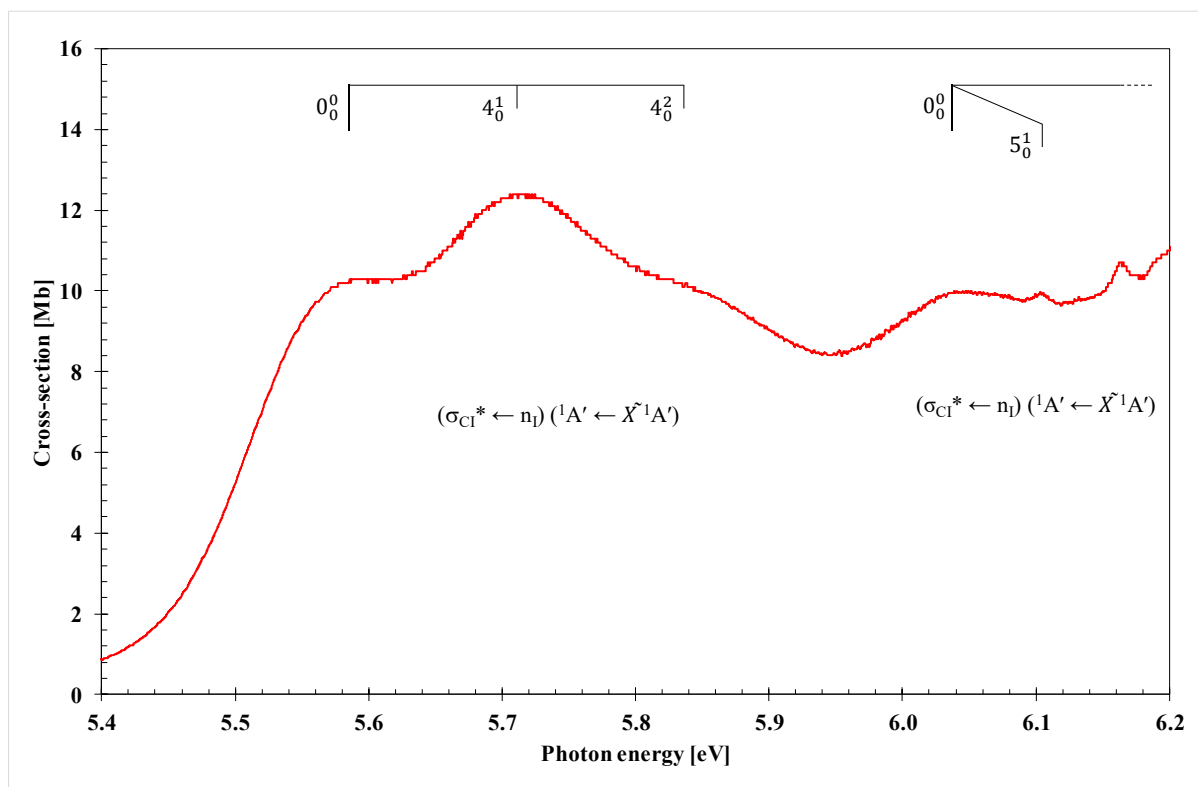

Figure S3. VUV photoabsorption spectrum of vinyl iodide,  $\text{C}_2\text{H}_3\text{I}$  in the 6.0–6.8 eV photon energy range together with assignments of the main absorption features.

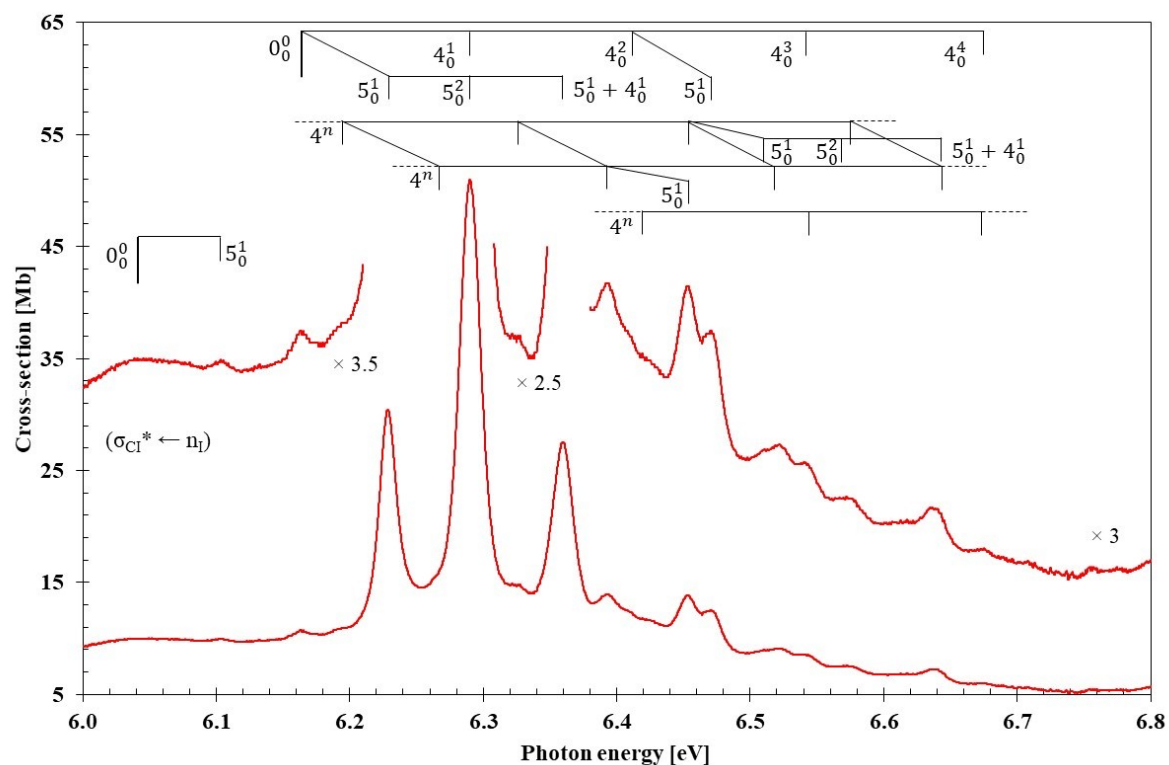

Figure S4. VUV photoabsorption spectrum of vinyl iodide,  $\text{C}_2\text{H}_3\text{I}$  in the 6.7–7.5 eV photon energy range together with assignments of the main absorption features.

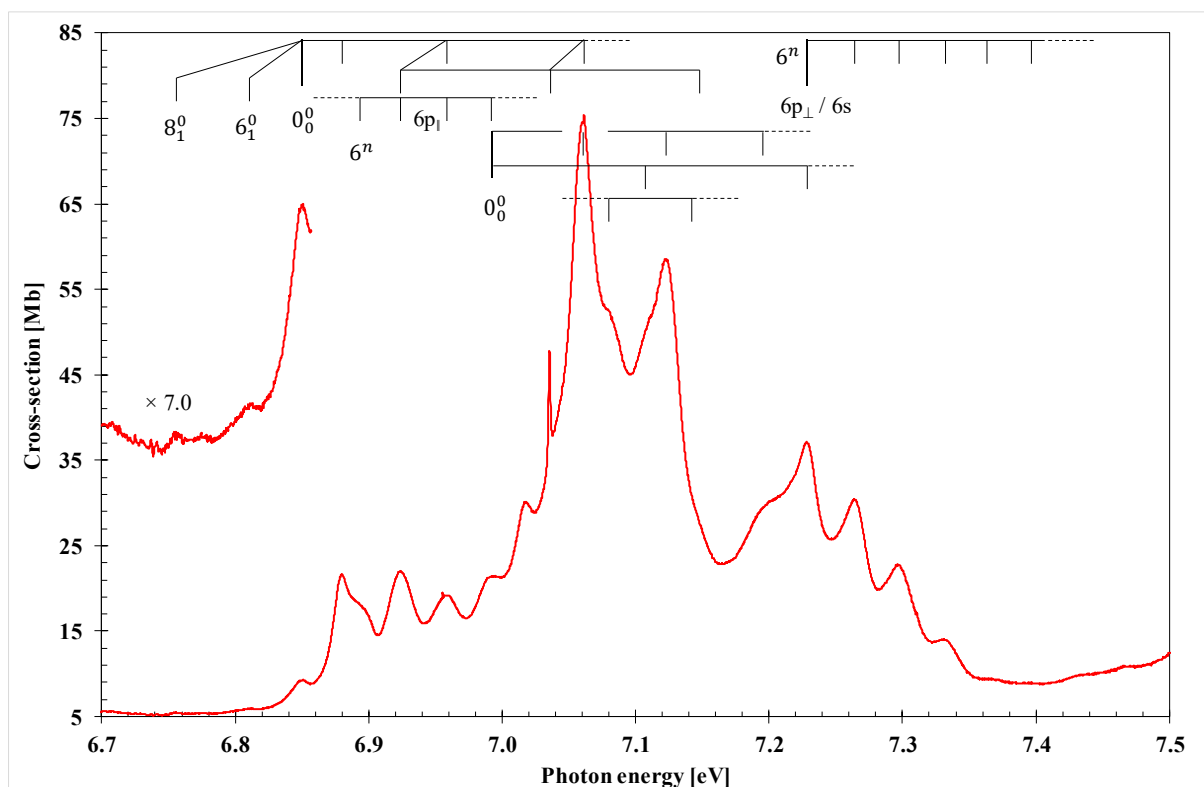

Figure S5. VUV photoabsorption spectrum of vinyl iodide,  $\text{C}_2\text{H}_3\text{I}$  in the 7.4–8.2 eV photon energy range together with assignments of the main absorption features.

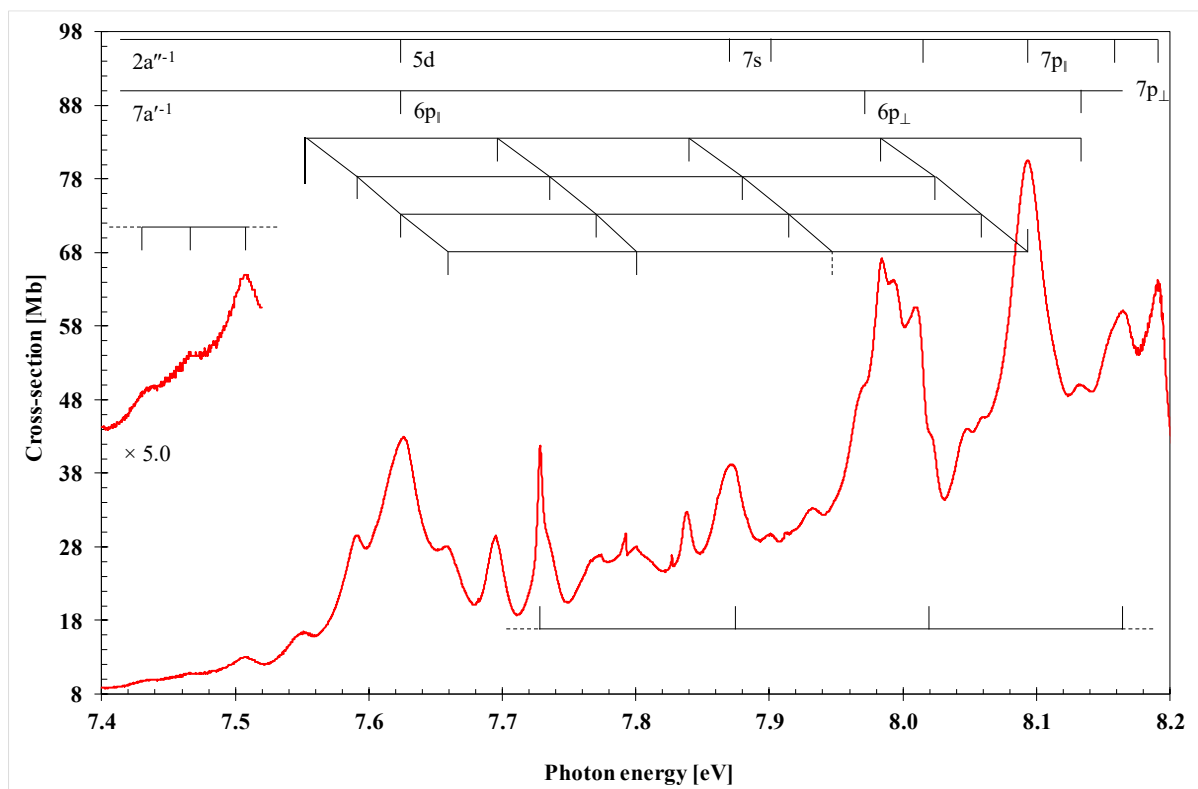

Figure S6. VUV photoabsorption spectrum of vinyl iodide,  $\text{C}_2\text{H}_3\text{I}$  in the 8.1–8.9 eV photon energy range together with assignments of the main absorption features.

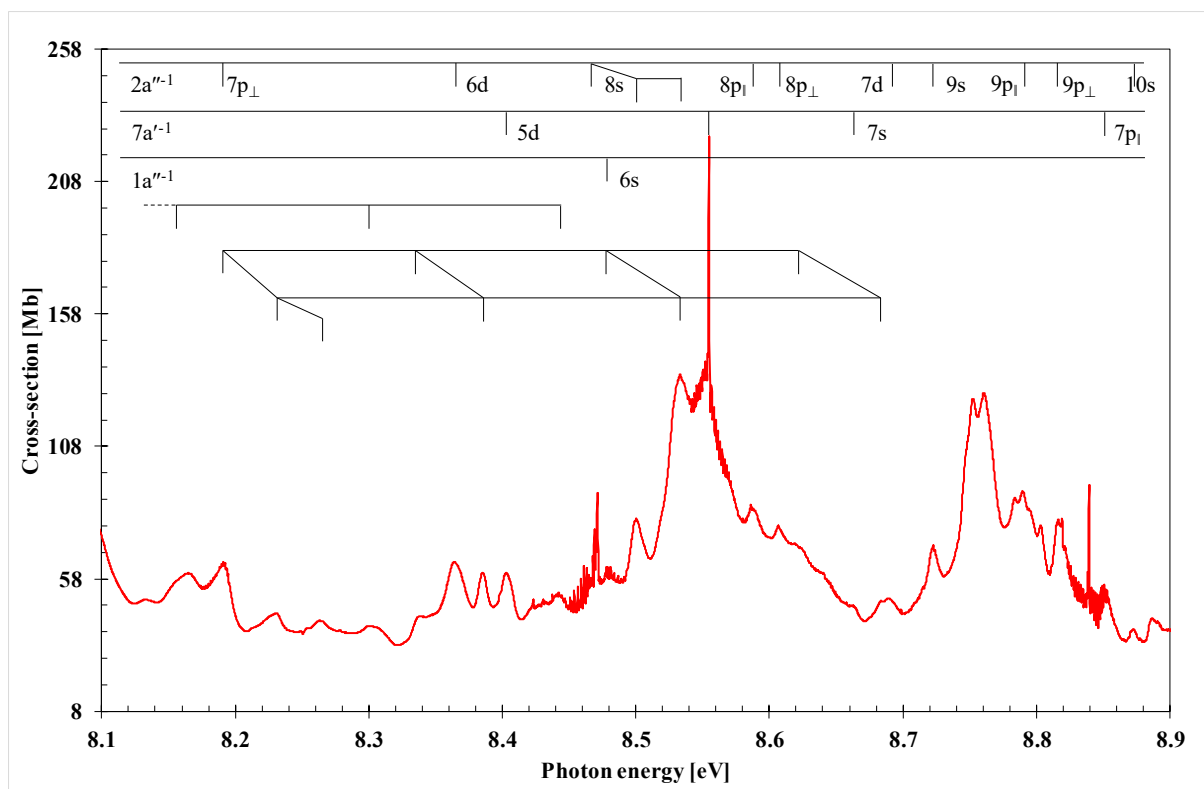

Figure S7. VUV photoabsorption spectrum of vinyl iodide,  $\text{C}_2\text{H}_3\text{I}$  in the 8.9–10.3 eV photon energy range together with assignments of the main absorption features.

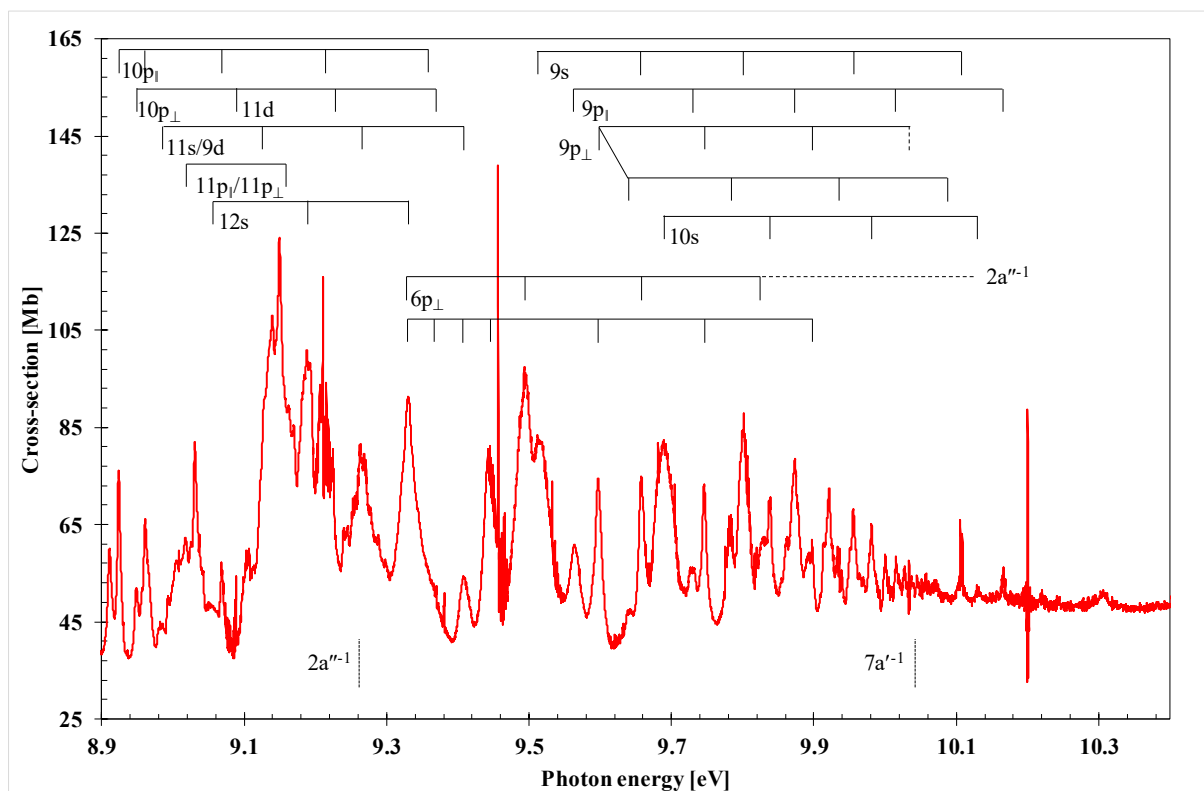



Table I – Experimental vertical excitation energies (in eV) of vinyl iodide, C<sub>2</sub>H<sub>3</sub>I, compared with data in the literature.

| this work               |                    |                                                               | previous work |                         |
|-------------------------|--------------------|---------------------------------------------------------------|---------------|-------------------------|
| energy <sup>#</sup>     | cross-section (Mb) | assignment                                                    | Ref. [1]      | Ref. [2]                |
| –                       | –                  | ( $\sigma_{\text{Cl}}^* \leftarrow n_{\text{I}(\perp)}$ )     | 4.959         | 4.919                   |
| 5.58(5)                 | 12.3               | ( $\sigma_{\text{Cl}}^* \leftarrow n_{\text{I}(\parallel)}$ ) | 5.579         | 5.700                   |
| 6.03(8)                 | 9.9                | ( $\sigma_{\text{Cl}}^* \leftarrow n_{\text{I}(\perp)}$ )     | 6.050         | 6.060                   |
| 6.230<br>6.291<br>6.361 | 50.7               | ( $\pi_{\text{CC}}^* \leftarrow n_{\text{I}(\parallel)}$ )    | ~6.296        | 6.232<br>6.279<br>6.342 |

<sup>#</sup>The last decimal of the energy is given in brackets for these less resolved features.

Table II – Proposed vibrational assignments in the 5.4–6.2 eV absorption band of C<sub>2</sub>H<sub>3</sub>I compared with previous work [1].

| This work           |            |                        |                        | Ref. [1] |             |
|---------------------|------------|------------------------|------------------------|----------|-------------|
| energy <sup>#</sup> | assignment | $\Delta E, \nu_4$ (eV) | $\Delta E, \nu_5$ (eV) | energy   | assignment* |
| 5.58(5)(b)          | $0_0^0$    | –                      | –                      | 5.598    | $0_0^0$     |
| 5.71(3)(b)          | $4_0^1$    | 0.128                  | –                      | 5.727    | $1_0^1$     |
| 5.83(6)(b,s)        | $4_0^2$    | 0.123                  | –                      | 5.862    | $1_0^2$     |
|                     |            |                        |                        |          |             |
| 6.03(8)(b)          | $0_0^0$    | –                      | –                      | 6.048    | –           |
| 6.106               | $5_0^1$    | –                      | 0.068                  | –        | –           |
| 6.166               | $4_0^1$    | 0.128                  | –                      | –        | –           |

<sup>#</sup> (b) broad structure, (s) shoulder structure (the last decimal of the energy value is given in brackets for these less-resolved features);

\* note that in Ref. [1] authors assign the excitation of three modes C=C stretching to  $\nu_1$ , C–I stretching to  $\nu_2$ , and C–C–I bending to  $\nu_3$ .

Table IIa – Proposed vibrational assignments in the 6.0–6.8 eV absorption band of C<sub>2</sub>H<sub>3</sub>I compared to previous work.<sup>2</sup>

| This work           |                                                           |                        |                        | Boschi and Salahub <sup>2</sup> |                             | <i>Sze et al.</i> <sup>1</sup> |
|---------------------|-----------------------------------------------------------|------------------------|------------------------|---------------------------------|-----------------------------|--------------------------------|
| energy <sup>#</sup> | assignment                                                | $\Delta E, \nu_4$ (eV) | $\Delta E, \nu_5$ (eV) | energy                          | assignment*                 | energy                         |
| 6.03(8)(b)          | 0 <sub>0</sub> <sup>0</sup>                               | –                      | –                      | 6.050                           | –                           | 6.060                          |
| 6.106               | 5 <sub>0</sub> <sup>1</sup>                               | –                      | 0.068                  | –                               | –                           | –                              |
|                     |                                                           |                        |                        |                                 |                             |                                |
| 6.166               | 0 <sub>0</sub> <sup>0</sup>                               | –                      | –                      | 6.221                           | 0 <sub>0</sub> <sup>0</sup> | –                              |
| 6.230               | 5 <sub>0</sub> <sup>1</sup>                               | –                      | 0.064                  | 6.281                           | 2 <sub>0</sub> <sup>1</sup> | –                              |
| 6.291               | 4 <sub>0</sub> <sup>1</sup> / 5 <sub>0</sub> <sup>2</sup> | 0.125                  | 0.061                  | 6.338                           | 2 <sub>0</sub> <sup>2</sup> | –                              |
| 6.361               | 5 <sub>0</sub> <sup>1</sup> + 4 <sub>0</sub> <sup>1</sup> | –                      | –                      | –                               | –                           | –                              |
| 6.41(2)(s)          | 4 <sub>0</sub> <sup>2</sup>                               | 0.121                  | –                      | –                               | –                           | –                              |
| 6.468               | 4 <sub>0</sub> <sup>2</sup> / 5 <sub>0</sub> <sup>2</sup> | –                      | 0.056                  | –                               | –                           | –                              |
| 6.538               | 4 <sub>0</sub> <sup>3</sup>                               | 0.126                  | –                      | –                               | –                           | –                              |
| 6.67(5)(w,b)        | 4 <sub>0</sub> <sup>4</sup>                               | 0.137                  | –                      | –                               | –                           | –                              |

<sup>#</sup> (b) broad structure, (s) shoulder structure and (w) weak feature (the last decimal of the energy value is given in brackets for these less-resolved features);

\* note that in Ref.<sup>2</sup> authors assign the excitation of modes C=C stretching to  $\nu_1$ , C–I stretching to  $\nu_2$ , and C–C–I bending to  $\nu_3$ .

Table IIb – Proposed vibrational assignments for progressions in the 6.0–6.8 eV absorption band of C<sub>2</sub>H<sub>3</sub>I.

| This work           |                           |                        |                        | Boschi and Salahub <sup>2</sup> |                 |
|---------------------|---------------------------|------------------------|------------------------|---------------------------------|-----------------|
| energy <sup>#</sup> | assignment                | $\Delta E, \nu_4$ (eV) | $\Delta E, \nu_5$ (eV) | energy                          | assignment*     |
| 6.19(7)(s)          | $4^n$                     | –                      | –                      | –                               | –               |
| 6.32(5)(s)          | $4^{n+1}$                 | 0.128                  | –                      | 6.392                           | $1_0^1$         |
| 6.452               | $4^{n+2}$                 | 0.127                  | –                      | 6.450                           | $1_0^1 + 2_0^1$ |
| 6.50(8)(s,w)        | $4^{n+2} + 5_0^1$         | –                      | 0.056                  | 6.506                           | $1_0^1 + 2_0^2$ |
| 6.56(6)(b,w)        | $4^{n+2} + 5_0^2$         | –                      | 0.058                  | 6.560                           | $1_0^2$         |
| 6.64(2)(b)          | $4^{n+2} + 5_0^1 + 4_0^1$ | –                      | –                      | –                               | –               |
| 6.57(8)(b)          | $4^{n+3}$                 | 0.126                  | –                      | –                               | –               |
|                     |                           |                        |                        |                                 |                 |
| 6.26(7)(s)          | $4^n$                     | –                      | –                      | –                               | –               |
| 6.396               | $4^{n+1}$                 | 0.129                  | –                      | –                               | –               |
| 6.452               | $4^{n+1} + 5_0^1$         | –                      | 0.056                  | –                               | –               |
| 6.51(9)(b)          | $4^{n+2}$                 | 0.123                  | –                      | –                               | –               |
| 6.64(2)(b)          | $4^{n+3}$                 | 0.123                  | –                      | 6.617                           | $1_0^2 + 2_0^1$ |
|                     |                           |                        |                        |                                 |                 |
| 6.42(1)(s)          | $4^n$                     | –                      | –                      | –                               | –               |
| 6.544               | $4^{n+1}$                 | 0.123                  | –                      | –                               | –               |
| 6.67(5)(w,b)        | $4^{n+2}$                 | 0.130                  | –                      | 6.672                           | $1_0^2 + 2_0^2$ |

<sup>#</sup> (s) shoulder structure, (b) broad structure, (w) weak feature (the last decimal of the energy value is given in brackets for these less-resolved features);

\* note that in Ref. <sup>2</sup> authors assign the excitation of three modes C=C stretching to  $\nu_1$ , C–I stretching to  $\nu_2$ , and C–C–I bending to  $\nu_3$ .

Table IV – Proposed vibrational assignments in the 6.7–7.5 eV absorption band of C<sub>2</sub>H<sub>3</sub>I.

| This work           |                             |                        |                        |                        | Ref. [1] |             |
|---------------------|-----------------------------|------------------------|------------------------|------------------------|----------|-------------|
| energy <sup>#</sup> | assignment                  | $\Delta E, \nu_5$ (eV) | $\Delta E, \nu_6$ (eV) | $\Delta E, \nu_8$ (eV) | energy   | assignment* |
| 6.754               | $8_1^0$                     | –                      | –                      | –                      | –        | –           |
| 6.81(1)(w)          | $6_1^0$                     | –                      | –                      | –                      | –        | –           |
| 6.849               | $0_0^0$ (?)                 | –                      | –                      | –                      | 6.877    | $0_0^0$     |
| 6.879               | $6_0^1$                     | –                      | 0.030                  | –                      | 6.920    | $3_0^1$     |
| 6.89(1)(s)          | $6^n$                       | –                      | –                      | –                      | –        | –           |
| 6.923               | $6p_{  }$                   | –                      | –                      | –                      | –        | –           |
| 6.957               | $8_0^1 / 6p_{  } + 6^{n+1}$ | –                      | 0.034                  | 0.108                  | 6.963    | $3_0^2$     |
| 6.99(1)(b)          | $6p_{  } + 6^{n+2}$         | –                      | 0.034                  | –                      | –        | –           |
| 7.035               | $6p_{  } + 8_0^1$           | –                      | –                      | 0.112                  | –        | –           |
| 7.061               | $8_0^2$                     | –                      | –                      | 0.104                  | 7.005    | $3_0^3$     |
| 7.148               | $6p_{  } + 8_0^2$           | –                      | –                      | 0.113                  | 7.045    | $3_0^4$     |
| 6.99(1)(b)          | $0_0^0$ (?)                 | –                      | –                      | –                      | –        | –           |
| 7.016               | $6_0^1$                     | –                      | 0.025                  | –                      | –        | –           |
| 7.04(8)(s)          | $6_0^2$                     | –                      | 0.032                  | –                      | 7.053    | $0_0^0$     |
| 7.061               | $5_0^1$                     | 0.070                  | –                      | –                      | –        | –           |
| 7.07(8)(s)          | $5^n$                       | –                      | 0.030                  | –                      | 7.115    | $2_0^1$     |
| 7.10(8)(s)          | $8_0^1$                     | –                      | –                      | 0.117                  | –        | –           |
| 7.121               | $5_0^2$                     | 0.060                  | –                      | –                      | –        | –           |
| 7.14(1)(w,s)        | $5^{n+1}$                   | 0.063                  | –                      | –                      | 7.178    | $2_0^2$     |
| 7.19(7)(b,s)        | $5_0^3$                     | 0.076                  | –                      | –                      | –        | –           |
| 7.228               | $8_0^2$                     | –                      | –                      | 0.120                  | –        | –           |
| 7.228               | $0_0^0 / 6p_{\perp} / 6s$   | –                      | –                      | –                      | 7.217    | $0_0^0$     |
| 7.263               | $6_0^1$                     | –                      | 0.035                  | –                      | 7.253    | $3_0^1$     |
| 7.296               | $6_0^2$                     | –                      | 0.033                  | –                      | 7.288    | $3_0^2$     |
| 7.330               | $6_0^3 / 8_0^1$             | –                      | 0.034                  | 0.100                  | 7.323    | $3_0^3$     |
| 7.36(5)(s,w)        | $6_0^4$                     | –                      | 0.035                  | –                      | 7.357    | $3_0^4$     |
| 7.39(6)(s,w)        | $6_0^5$                     | –                      | 0.031                  | –                      | –        | –           |

<sup>#</sup> (w) weak feature, (s) shoulder structure, (b) broad structure (the last decimal of the energy value is given in brackets for these less-resolved features);

\* note that in Ref. [1] authors assign the excitation of three modes C=C stretching to  $\nu_1$ , C–I stretching to  $\nu_2$ , and C–C–I bending to  $\nu_3$ .

Table V – Proposed vibrational assignments in the 7.4–8.2 eV absorption band of C<sub>2</sub>H<sub>3</sub>I.

| energy <sup>#</sup> | assignment                                                                                                                              | $\Delta E, \nu_4$ (eV) | $\Delta E, \nu_5$ (eV) | $\Delta E, \nu_6$ (eV) | $\Delta E, \nu_7$ (eV) |
|---------------------|-----------------------------------------------------------------------------------------------------------------------------------------|------------------------|------------------------|------------------------|------------------------|
| 7.42(9)(s)          | ?                                                                                                                                       | —                      | —                      | —                      | —                      |
| 7.46(2)(s)          | ?                                                                                                                                       | —                      | —                      | —                      | —                      |
| 7.506               | ?                                                                                                                                       | —                      | —                      | —                      | —                      |
| 7.549               | 0 <sub>0</sub> <sup>0</sup> (?)                                                                                                         | —                      | —                      | —                      | —                      |
| 7.589               | 5 <sub>0</sub> <sup>1</sup>                                                                                                             | —                      | 0.040                  | —                      | —                      |
| 7.628               | 5d (2a <sup>''-1</sup> ) / 6p <sub>  </sub> (7a <sup>'-1</sup> )                                                                        | —                      | —                      | —                      | —                      |
| 7.658               | 5d (2a <sup>''-1</sup> ) / 6p <sub>  </sub> (7a <sup>'-1</sup> ) + 6 <sub>0</sub> <sup>1</sup>                                          | —                      | —                      | 0.030                  | —                      |
| 7.693               | 7 <sub>0</sub> <sup>1</sup>                                                                                                             | —                      | —                      | —                      | 0.144                  |
| 7.728               | 7 <sup>n</sup>                                                                                                                          | —                      | —                      | —                      | —                      |
| 7.73(6)(s)          | 5 <sub>0</sub> <sup>1</sup> + 7 <sub>0</sub> <sup>1</sup>                                                                               | —                      | —                      | —                      | 0.147                  |
| 7.76(8)(b)          | 5d (2a <sup>''-1</sup> ) / 6p <sub>  </sub> (7a <sup>'-1</sup> ) + 7 <sub>0</sub> <sup>1</sup>                                          | —                      | —                      | —                      | 0.140                  |
| 7.800               | 5d (2a <sup>''-1</sup> ) / 6p <sub>  </sub> (7a <sup>'-1</sup> ) + 6 <sub>0</sub> <sup>1</sup> + 7 <sub>0</sub> <sup>1</sup>            | —                      | —                      | —                      | 0.142                  |
| 7.837               | 7 <sub>0</sub> <sup>2</sup>                                                                                                             | —                      | —                      | —                      | 0.144                  |
| 7.86(9)(b)          | 7s + 7 <sup>n+1</sup>                                                                                                                   | —                      | —                      | —                      | 0.141                  |
| 7.87(9)(s,w)        | 5 <sub>0</sub> <sup>1</sup> + 7 <sub>0</sub> <sup>2</sup>                                                                               | —                      | —                      | —                      | 0.143                  |
| 7.900               | 7s + 6 <sub>0</sub> <sup>1</sup>                                                                                                        | —                      | —                      | 0.031                  | —                      |
| 7.91(3)(b)          | 5d (2a <sup>''-1</sup> ) / 6p <sub>  </sub> (7a <sup>'-1</sup> ) + 7 <sub>0</sub> <sup>2</sup>                                          | —                      | —                      | —                      | 0.145                  |
| 7.95(0)(w,s)        | 5d (2a <sup>''-1</sup> ) / 6p <sub>  </sub> (7a <sup>'-1</sup> ) + 6 <sub>0</sub> <sup>1</sup> + 7 <sub>0</sub> <sup>2</sup>            | —                      | —                      | —                      | 0.150                  |
| 7.97(0)(s)          | 6p <sub>⊥</sub>                                                                                                                         | —                      | —                      | —                      | —                      |
| 7.984               | 7 <sub>0</sub> <sup>3</sup>                                                                                                             | —                      | —                      | —                      | 0.147                  |
| 8.02(0)(s)          | 5 <sub>0</sub> <sup>1</sup> + 7 <sub>0</sub> <sup>3</sup> / 7 <sup>n+2</sup>                                                            | —                      | —                      | —                      | 0.141                  |
| 8.05(7)(w)          | 5d (2a <sup>''-1</sup> ) / 6p <sub>  </sub> (7a <sup>'-1</sup> ) + 7 <sub>0</sub> <sup>3</sup>                                          | —                      | —                      | —                      | 0.144                  |
| 8.01(9)(s)          | 7s (2a <sup>''-1</sup> ) + 7 <sub>0</sub> <sup>1</sup>                                                                                  | —                      | —                      | —                      | 0.150                  |
| 8.095               | 7p <sub>  </sub> (2a <sup>''-1</sup> ) / 5d (2a <sup>''-1</sup> ) / 6p <sub>  </sub> (7a <sup>'-1</sup> ) + 7 <sub>0</sub> <sup>4</sup> | —                      | —                      | —                      | —                      |
| 8.13(0)(b)          | 6p <sub>⊥</sub> (7a <sup>'-1</sup> ) + 4 <sub>0</sub> <sup>1</sup> / 7 <sub>0</sub> <sup>4</sup>                                        | 0.160                  | —                      | —                      | 0.146                  |
| 8.16(2)(b)          | 7s (2a <sup>''-1</sup> ) + 7 <sub>0</sub> <sup>2</sup> / 7 <sup>n+3</sup>                                                               | —                      | —                      | —                      | 0.143                  |
| 8.191               | 7p <sub>⊥</sub> (2a <sup>''-1</sup> )                                                                                                   | —                      | —                      | —                      | —                      |

<sup>#</sup> (s) shoulder structure, (b) broad structure, (w) weak feature (the last decimal of the energy value is given in brackets for these less-resolved features); (?) unassigned feature.

Table VI – Proposed vibrational assignments and progressions in the 8.1–8.9 eV absorption band of C<sub>2</sub>H<sub>3</sub>I.

| energy <sup>#</sup> | assignment                                              | $\Delta E, \nu_6$ (eV) | $\Delta E, \nu_7$ (eV) |
|---------------------|---------------------------------------------------------|------------------------|------------------------|
| 8.16(2)(b)          | $7s(2a''^{-1}) + 7_0^2 / 7^{n+3}$                       | –                      | –                      |
| 8.191               | $7p_{\perp}(2a''^{-1})$                                 | –                      | –                      |
| 8.22(9)(b)          | $7^n$                                                   | –                      | –                      |
| 8.26(2)(b)          | $7^n + 6_0^1$                                           | 0.033                  | –                      |
| 8.29(7)(b)          | $7s(2a''^{-1}) + 7_0^3 / 7^{n+4}$                       | –                      | 0.135                  |
| 8.33(6)(s)          | $7p_{\perp}(2a''^{-1}) + 7_0^1$                         | –                      | 0.145                  |
| 8.384               | $7^{n+1}$                                               | –                      | 0.155                  |
| 8.405               | $5d(7a'^{-1})$                                          | –                      | –                      |
| 8.441               | $7s(2a''^{-1}) + 7_0^4 / 7^{n+5}$                       | –                      | 0.144                  |
| 8.464               | $8s(2a''^{-1})$                                         | –                      | –                      |
| 8.478               | $6s(1a''^{-1}) / 7p_{\perp}(2a''^{-1}) + 7_0^2$         | –                      | 0.142                  |
| 8.499               | $8s(2a''^{-1}) + 6_0^1$                                 | 0.035                  | –                      |
| 8.532               | $7^{n+2} / 8s(2a''^{-1}) + 6_0^2$                       | 0.033                  | 0.148                  |
| 8.555               | $5d(7a'^{-1}) + 7_0^1$                                  | –                      | 0.150                  |
| 8.608               | $8s(2a''^{-1}) + 7_0^1 / 8p_{\perp}(2a''^{-1})$         | –                      | –                      |
| 8.61(9)(s)          | $6s(1a''^{-1}) + 7_0^1 / 7p_{\perp}(2a''^{-1}) + 7_0^3$ | –                      | 0.141                  |
| 8.68(3)(s)          | $7^{n+3}$                                               | –                      | 0.151                  |
| 8.723               | $9s(2a''^{-1})$                                         | –                      | –                      |
| 8.752               | $8s(2a''^{-1}) + 7_0^2 / 8p_{\perp}(2a''^{-1}) + 7_0^1$ | –                      | 0.144                  |
| 8.760               | $9s(2a''^{-1}) + 6_0^1$                                 | 0.037                  | –                      |
| 8.839               | $7d(2a''^{-1}) + 7_0^1$                                 | –                      | –                      |
| 8.885               | $9s(2a''^{-1}) + 7_0^1 / 10s(2a''^{-1})$                | –                      | 0.162                  |

<sup>#</sup> (s) shoulder structure, (w) weak feature, (b) broad structure, (the last decimal of the energy value is given in brackets for these less-resolved features);

Table VIIa – Proposed vibrational assignments in the 8.9–10.3 eV absorption band of C<sub>2</sub>H<sub>3</sub>I converging to the ionic electronic ground state (2a''<sup>-1</sup>).

| energy <sup>#</sup> | assignment                                                                                                                     | $\Delta E, \nu_6$ (eV) | $\Delta E, \nu_7$ (eV) |
|---------------------|--------------------------------------------------------------------------------------------------------------------------------|------------------------|------------------------|
| 8.924               | 10p <sub>i</sub> (2a'' <sup>-1</sup> )                                                                                         | –                      | –                      |
| 8.950               | 10p <sub>⊥</sub> (2a'' <sup>-1</sup> )                                                                                         | –                      | –                      |
| 8.960               | 10p <sub>i</sub> (2a'' <sup>-1</sup> ) + 6 <sub>0</sub> <sup>1</sup>                                                           | 0.036                  | –                      |
| 8.982               | 11s (2a'' <sup>-1</sup> ) / 9d (2a'' <sup>-1</sup> )                                                                           | –                      | –                      |
| 9.01(7)(s)          | 11p <sub>i</sub> (2a'' <sup>-1</sup> ) / 11p <sub>⊥</sub> (2a'' <sup>-1</sup> )                                                | –                      | –                      |
| 9.05(9)(b)          | 12s (2a'' <sup>-1</sup> )                                                                                                      | –                      | –                      |
| 9.068               | 10p <sub>i</sub> (2a'' <sup>-1</sup> ) + 7 <sub>0</sub> <sup>1</sup>                                                           | –                      | 0.144                  |
| 9.088               | 11d (2a'' <sup>-1</sup> ) / 10p <sub>⊥</sub> (2a'' <sup>-1</sup> ) + 7 <sub>0</sub> <sup>1</sup>                               | –                      | 0.138                  |
| 9.123               | 11s (2a'' <sup>-1</sup> ) / 9d (2a'' <sup>-1</sup> ) + 7 <sub>0</sub> <sup>1</sup>                                             | –                      | 0.141                  |
| 9.15(9)(s)          | 11p <sub>i</sub> (2a'' <sup>-1</sup> ) / 11p <sub>⊥</sub> (2a'' <sup>-1</sup> ) + 7 <sub>0</sub> <sup>1</sup>                  | –                      | 0.142                  |
| 9.188               | 12s (2a'' <sup>-1</sup> ) + 7 <sub>0</sub> <sup>1</sup>                                                                        | –                      | 0.129                  |
| 9.211               | 10p <sub>i</sub> (2a'' <sup>-1</sup> ) + 7 <sub>0</sub> <sup>2</sup>                                                           | –                      | 0.143                  |
| 9.22(8)(s,w)        | 11d (2a'' <sup>-1</sup> ) + 7 <sub>0</sub> <sup>1</sup> / 10p <sub>⊥</sub> (2a'' <sup>-1</sup> ) + 7 <sub>0</sub> <sup>2</sup> | –                      | 0.140                  |
| 9.262               | 11s (2a'' <sup>-1</sup> ) / 9d (2a'' <sup>-1</sup> ) + 7 <sub>0</sub> <sup>2</sup>                                             | –                      | 0.139                  |
| 9.330               | 12s (2a'' <sup>-1</sup> ) + 7 <sub>0</sub> <sup>2</sup>                                                                        | –                      | 0.142                  |
| 9.35(7)(s,w)        | 10p <sub>i</sub> (2a'' <sup>-1</sup> ) + 7 <sub>0</sub> <sup>3</sup>                                                           | –                      | 0.146                  |
| 9.36(4)(s)          | 11d (2a'' <sup>-1</sup> ) + 7 <sub>0</sub> <sup>2</sup> / 10p <sub>⊥</sub> (2a'' <sup>-1</sup> ) + 7 <sub>0</sub> <sup>3</sup> | –                      | 0.136                  |
| 9.407               | 11s (2a'' <sup>-1</sup> ) / 9d (2a'' <sup>-1</sup> ) + 7 <sub>0</sub> <sup>3</sup>                                             | –                      | 0.145                  |

<sup>#</sup>(s) shoulder structure, (b) broad structure, (w) weak feature (the last decimal of the energy value is given in brackets for these less-resolved features).



Table VIIb – Proposed vibrational assignments in the 8.9–10.3 eV absorption band of C<sub>2</sub>H<sub>3</sub>I converging to the ionic electronic first excited state (7a<sup>-1</sup>).

| energy <sup>#</sup> | assignment                                                                                                                                                            | $\Delta E, \nu_5$ (eV) | $\Delta E, \nu_7$ (eV) |
|---------------------|-----------------------------------------------------------------------------------------------------------------------------------------------------------------------|------------------------|------------------------|
| 9.519               | 9s (7a <sup>-1</sup> )                                                                                                                                                | –                      | –                      |
| 9.567               | 9p <sub>  </sub> (7a <sup>-1</sup> )                                                                                                                                  | –                      | –                      |
| 9.598               | 9p <sub>⊥</sub> (7a <sup>-1</sup> )                                                                                                                                   | –                      | –                      |
| 9.63(7)(s)          | 9p <sub>⊥</sub> (7a <sup>-1</sup> ) + 5 <sub>0</sub> <sup>1</sup>                                                                                                     | 0.039                  | –                      |
| 9.657               | 9s (7a <sup>-1</sup> ) + 7 <sub>0</sub> <sup>1</sup>                                                                                                                  | –                      | 0.138                  |
| 9.69(0)(b)          | 10s                                                                                                                                                                   | –                      | –                      |
| 9.727               | 9p <sub>  </sub> (7a <sup>-1</sup> ) + 7 <sub>0</sub> <sup>1</sup>                                                                                                    | –                      | 0.160                  |
| 9.745               | 9p <sub>⊥</sub> (7a <sup>-1</sup> ) + 7 <sub>0</sub> <sup>1</sup>                                                                                                     | –                      | 0.147                  |
| 9.783               | 9p <sub>⊥</sub> (7a <sup>-1</sup> ) + 5 <sub>0</sub> <sup>1</sup> + 7 <sub>0</sub> <sup>1</sup> / 11p <sub>  </sub> (7a <sup>-1</sup> )                               | –                      | 0.146                  |
| 9.802               | 9s (7a <sup>-1</sup> ) + 7 <sub>0</sub> <sup>2</sup>                                                                                                                  | –                      | 0.145                  |
| 9.835               | 10s + 7 <sub>0</sub> <sup>1</sup> / 12s                                                                                                                               | –                      | 0.145                  |
| 9.873               | 9p <sub>  </sub> (7a <sup>-1</sup> ) + 7 <sub>0</sub> <sup>2</sup>                                                                                                    | –                      | 0.146                  |
| 9.897               | 9p <sub>⊥</sub> (7a <sup>-1</sup> ) + 7 <sub>0</sub> <sup>2</sup>                                                                                                     | –                      | 0.152                  |
| 9.933               | 9p <sub>⊥</sub> (7a <sup>-1</sup> ) + 5 <sub>0</sub> <sup>1</sup> + 7 <sub>0</sub> <sup>2</sup> / 11p <sub>  </sub> (7a <sup>-1</sup> ) + 7 <sub>0</sub> <sup>1</sup> | –                      | 0.150                  |
| 9.955               | 9s (7a <sup>-1</sup> ) + 7 <sub>0</sub> <sup>3</sup>                                                                                                                  | –                      | 0.153                  |
| 9.981               | 10s (7a <sup>-1</sup> ) + 7 <sub>0</sub> <sup>2</sup> / 12s + 7 <sub>0</sub> <sup>1</sup>                                                                             | –                      | 0.146                  |
| 10.015              | 9p <sub>  </sub> (7a <sup>-1</sup> ) + 7 <sub>0</sub> <sup>3</sup>                                                                                                    | –                      | 0.142                  |
| 10.03(0)(w)         | 9p <sub>⊥</sub> (7a <sup>-1</sup> ) + 7 <sub>0</sub> <sup>3</sup>                                                                                                     | –                      | 0.133                  |
| 10.08(0)(w,b)       | 9p <sub>⊥</sub> (7a <sup>-1</sup> ) + 5 <sub>0</sub> <sup>1</sup> + 7 <sub>0</sub> <sup>3</sup> / 11p <sub>  </sub> (7a <sup>-1</sup> ) + 7 <sub>0</sub> <sup>2</sup> | –                      | 0.147                  |
| 10.105              | 9s (7a <sup>-1</sup> ) + 7 <sub>0</sub> <sup>4</sup> / 7s (1a <sup>-1</sup> )                                                                                         | –                      | 0.150                  |
| 10.129              | 10s (7a <sup>-1</sup> ) + 7 <sub>0</sub> <sup>3</sup> / 12s + 7 <sub>0</sub> <sup>2</sup>                                                                             | –                      | 0.148                  |
| 10.166              | 9p <sub>  </sub> (7a <sup>-1</sup> ) + 7 <sub>0</sub> <sup>4</sup>                                                                                                    | –                      | 0.151                  |

<sup>#</sup>(s) shoulder structure, (b) broad structure, (w) weak feature (the last decimal of the energy value is given in brackets for these less-resolved features).

Table VIIc – Proposed vibrational assignments in the 8.9–10.3 eV absorption band of C<sub>2</sub>H<sub>3</sub>I converging to the ionic electronic second excited state (1a<sup>''-1</sup>).

| energy <sup>#</sup> | assignment                                                                                                                                                                                           | $\Delta E, \nu_4$ (eV) | $\Delta E, \nu_6$ (eV) | $\Delta E, \nu_7$ (eV) |
|---------------------|------------------------------------------------------------------------------------------------------------------------------------------------------------------------------------------------------|------------------------|------------------------|------------------------|
| 9.329               | 6p <sub>⊥</sub> (1a <sup>''-1</sup> )                                                                                                                                                                | –                      | –                      | –                      |
| 9.36(4)(s)          | 6p <sub>⊥</sub> (1a <sup>''-1</sup> ) + 6 <sub>0</sub> <sup>1</sup> / 11d (2a <sup>''-1</sup> ) + 7 <sub>0</sub> <sup>2</sup> / 10p <sub>⊥</sub> (2a <sup>''-1</sup> ) + 7 <sub>0</sub> <sup>3</sup> | –                      | 0.035                  | –                      |
| 9.407               | 6p <sub>⊥</sub> (1a <sup>''-1</sup> ) + 6 <sub>0</sub> <sup>2</sup> / 11s (2a <sup>''-1</sup> ) / 9d (2a <sup>''-1</sup> ) + 7 <sub>0</sub> <sup>3</sup>                                             | –                      | 0.043                  | –                      |
| 9.442               | 6p <sub>⊥</sub> (1a <sup>''-1</sup> ) + 6 <sub>0</sub> <sup>3</sup>                                                                                                                                  | –                      | 0.035                  | –                      |
| 9.493               | 6p <sub>⊥</sub> (1a <sup>''-1</sup> ) + 4 <sub>0</sub> <sup>1</sup>                                                                                                                                  | 0.164                  | –                      | –                      |
| 9.598               | 6p <sub>⊥</sub> (1a <sup>''-1</sup> ) + 6 <sub>0</sub> <sup>3</sup> + 7 <sub>0</sub> <sup>1</sup> / 9p <sub>⊥</sub> (7a <sup>′-1</sup> )                                                             | –                      | –                      | 0.156                  |
| 9.657               | 6p <sub>⊥</sub> (1a <sup>''-1</sup> ) + 4 <sub>0</sub> <sup>1</sup> / 9s (7a <sup>′-1</sup> ) + 7 <sub>0</sub> <sup>1</sup>                                                                          | 0.164                  | –                      | –                      |
| 9.745               | 6p <sub>⊥</sub> (1a <sup>''-1</sup> ) + 6 <sub>0</sub> <sup>3</sup> + 7 <sub>0</sub> <sup>2</sup> / 9p <sub>⊥</sub> (7a <sup>′-1</sup> ) + 7 <sub>0</sub> <sup>1</sup>                               | –                      | –                      | 0.147                  |
| 9.82(6)(s)          | 6p <sub>⊥</sub> (1a <sup>''-1</sup> ) + 4 <sub>0</sub> <sup>2</sup>                                                                                                                                  | 0.169                  | –                      | –                      |
| 9.897               | 6p <sub>⊥</sub> (1a <sup>''-1</sup> ) + 6 <sub>0</sub> <sup>3</sup> + 7 <sub>0</sub> <sup>3</sup> / 9p <sub>⊥</sub> (7a <sup>′-1</sup> ) + 7 <sub>0</sub> <sup>2</sup>                               | –                      | –                      | 0.152                  |

<sup>#</sup>(s) shoulder structure (the last decimal of the energy value is given in brackets for these less-resolved features).

Table VIIIa – Energy value (eV) and effective quantum number ( $n^*$ ) of the Rydberg series converging to the ionic electronic ground state of  $C_2H_3I$ .<sup>a</sup>

| This work                              |       |                   | Ref. [2]        |       |
|----------------------------------------|-------|-------------------|-----------------|-------|
| vertical energy                        | $n^*$ | assignment        | vertical energy | $n^*$ |
| $IE_1 = 9.26 \text{ eV}^b (2a''^{-1})$ |       |                   |                 |       |
| 6.230                                  | 2.12  | 6s                | 6.232           | 2.12  |
| 6.291                                  | 2.14  |                   | 6.279           | 2.14  |
| 6.361                                  | 2.17  |                   | 6.342           | 2.16  |
| 7.86(9)(b)                             | 3.13  | 7s                | 7.858           | 3.12  |
| 8.464                                  | 4.13  | 8s                | 8.750           | 4.38  |
| 8.723                                  | 5.03  | 9s                | —               | —     |
| 8.885                                  | 6.02  | 10s               | —               | —     |
| 8.982                                  | 7.00  | 11s               | —               | —     |
| 9.05(9)(b)                             | 8.23  | 12s               | —               | —     |
|                                        |       |                   |                 |       |
| 6.921                                  | 2.41  | 6p <sub>  </sub>  | 6.920           | 2.41  |
| 8.095                                  | 3.42  | 7p <sub>  </sub>  | 8.093           | 3.41  |
| 8.585                                  | 4.49  | 8p <sub>  </sub>  | —               | —     |
| 8.791                                  | 5.39  | 9p <sub>  </sub>  | —               | —     |
| 8.924                                  | 6.36  | 10p <sub>  </sub> | —               | —     |
| 9.01(7)(s)                             | 7.48  | 11p <sub>  </sub> | —               | —     |
|                                        |       |                   |                 |       |
| 7.230                                  | 2.59  | 6p <sub>⊥</sub>   | 7.202           | 2.57  |
| 8.191                                  | 3.57  | 7p <sub>⊥</sub>   | 8.171           | 3.53  |
| 8.608                                  | 4.57  | 8p <sub>⊥</sub>   | —               | —     |
| 8.817                                  | 5.54  | 9p <sub>⊥</sub>   | —               | —     |
| 8.950                                  | 6.63  | 10p <sub>⊥</sub>  | —               | —     |
| 9.01(7)(s)                             | 7.48  | 11p <sub>⊥</sub>  | —               | —     |
|                                        |       |                   |                 |       |
| 7.628                                  | 2.89  | 5d                | 7.616           | 2.88  |
| 8.367                                  | 3.90  | 6d                | 8.546           | 3.95  |
| 8.694                                  | 4.90  | 7d                | —               | —     |
| 8.874                                  | 5.94  | 8d                | —               | —     |
| 8.982                                  | 7.00  | 9d                | —               | —     |
| 9.044                                  | 7.94  | 10d               | —               | —     |
| 9.088                                  | 8.90  | 11d               | —               | —     |

<sup>a</sup> (b) broad structure, (s) shoulder structure (the last decimal of the energy value is given in brackets for these less-resolved features); <sup>b</sup> vertical values from Ref. [2].

Table VIIIb – Energy value (eV) and effective quantum number ( $n^*$ ) of the Rydberg series converging to the ionic electronic first excited state of  $C_2H_3I$ .<sup>a</sup>

| This work                             |       |                   | Ref. [2]        |       |
|---------------------------------------|-------|-------------------|-----------------|-------|
| vertical energy                       | $n^*$ | assignment        | vertical energy | $n^*$ |
| $IE_1 = 10.04 \text{ eV}^b (7a^{-1})$ |       |                   |                 |       |
| 7.230                                 | 2.20  | 6s                | 7.077           | 2.14  |
| 8.66(5)(s)                            | 3.15  | 7s                | 8.750           | 3.25  |
| 9.25(7)(s)                            | 4.17  | 8s                | 9.313           | 4.32  |
| 9.519                                 | 5.11  | 9s                | 9.500           | 5.02  |
| 9.69(0)(b)                            | 6.24  | 10s               | 9.672           | 6.06  |
| 9.783                                 | 7.28  | 11s               | 9.829           | 8.05  |
| 9.835                                 | 8.15  | 12s               | —               | —     |
| 9.87(9)(s,w)                          | 9.19  | 13s               | —               | —     |
|                                       |       |                   |                 |       |
| 7.628                                 | 2.38  | 6p <sub>  </sub>  | 7.616           | 2.37  |
| 8.848                                 | 3.38  | 7p <sub>  </sub>  | —               | —     |
| 9.332                                 | 4.38  | 8p <sub>  </sub>  | —               | —     |
| 9.567                                 | 5.36  | 9p <sub>  </sub>  | —               | —     |
| 9.69(2)(b)                            | 6.25  | 10p <sub>  </sub> | —               | —     |
| 9.783                                 | 7.28  | 11p <sub>  </sub> | —               | —     |
|                                       |       |                   |                 |       |
| 7.97(0)(s)                            | 2.56  | 6p <sub>⊥</sub>   | 7.984           | 2.57  |
| 8.982                                 | 3.59  | 7p <sub>⊥</sub>   | 9.016           | 3.65  |
| 9.37(2)(s,w)                          | 4.51  | 8p <sub>⊥</sub>   | —               | —     |
| 9.598                                 | 5.55  | 9p <sub>⊥</sub>   | —               | —     |
| 9.73(3)(b,w)                          | 6.66  | 10p <sub>⊥</sub>  | —               | —     |
|                                       |       |                   |                 |       |
| 8.405                                 | 2.89  | 5d                | 8.390           | 2.87  |
| 9.147                                 | 3.90  | 6d                | —               | —     |
| 9.493                                 | 4.99  | 7d                | —               | —     |

<sup>a</sup> (s) shoulder structure, (b) broad structure, (w) weak feature (the last decimal of the energy value is given in brackets for these less-resolved features).

Table VIIIc – Energy value (eV) and effective quantum number ( $n^*$ ) of the Rydberg series converging to the ionic electronic second excited state of  $C_2H_3I$ .<sup>a</sup>

| This work                               |       |              | Ref. [2]        |       |
|-----------------------------------------|-------|--------------|-----------------|-------|
| vertical energy                         | $n^*$ | assignment   | vertical energy | $n^*$ |
| $IE_1 = 11.50 \text{ eV}^b (1a''^{-1})$ |       |              |                 |       |
| 8.478                                   | 2.12  | 6s           | 8.546           | 2.15  |
| 10.105                                  | 3.12  | 7s           | —               | —     |
|                                         |       |              |                 |       |
| 9.15(9)(s)                              | 2.41  | $6p_{  }$    | 9.156           | 2.41  |
| 10.30(2)(b)                             | 3.37  | $7p_{  }$    | —               | —     |
|                                         |       |              |                 |       |
| 9.329                                   | 2.50  | $6p_{\perp}$ | 9.313           | 2.49  |
|                                         |       |              |                 |       |
| 9.82(6)(s)                              | 2.85  | 5d           | 9.829           | 2.85  |

<sup>a</sup> (s) shoulder structure, (b) broad structure (the last decimal of the energy value is given in brackets for these less-resolved features).

## References

- [1] R. A. Boschi, D. R. Salahub, *Mol. Phys.* **24** (1972) 735.
- [2] K. H. Sze, C. E. Brion, A. Katrib, B. El-Issa, *Chem. Phys.* **137** (1989) 369.
- [3] P. Torkington, H. W. Thompson, *J. Chem. Soc.* (1944) 303.
- [4] N. S. Shuman, M. A. Ochieng, B. Sztaray, and T. Baer, *J. Phys. Chem.* **112** (2008) 5647.
- [5] G. W. Mines and H. W. Thomson, *Spectrochim. Acta A* **29A** (1973) 1377.
